# Supplementary material for: Building confidence in STEM students through breaking (unseen) barriers
Source: Copernicus journal article supplement (doi:10.5194/gc-5-355-2022), 2022-11-14
Supplement: Supplementary file 2 [file gc-5-355-2022-supplement.zip]

# Pre-course Evaluation

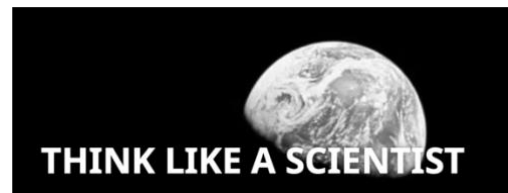

Course: *Think Like A Scientist*

Instructor: *X*

Rate the statement as it relates to you:

|                                                    | <i>Strongly<br/>Agree</i> | <i>Agree</i>             | <i>Neutral</i>           | <i>Disagree</i>          | <i>Strongly<br/>Disagree</i> |
|----------------------------------------------------|---------------------------|--------------------------|--------------------------|--------------------------|------------------------------|
| 1. "I read about science in my free time"          | <input type="checkbox"/>  | <input type="checkbox"/> | <input type="checkbox"/> | <input type="checkbox"/> | <input type="checkbox"/>     |
| 2. "I enjoy learning about scientific discoveries" | <input type="checkbox"/>  | <input type="checkbox"/> | <input type="checkbox"/> | <input type="checkbox"/> | <input type="checkbox"/>     |
| 3. "Science is for everyone"                       | <input type="checkbox"/>  | <input type="checkbox"/> | <input type="checkbox"/> | <input type="checkbox"/> | <input type="checkbox"/>     |
| 4. "Science is creative"                           | <input type="checkbox"/>  | <input type="checkbox"/> | <input type="checkbox"/> | <input type="checkbox"/> | <input type="checkbox"/>     |
| 5. "Science is difficult"                          | <input type="checkbox"/>  | <input type="checkbox"/> | <input type="checkbox"/> | <input type="checkbox"/> | <input type="checkbox"/>     |
| 6. "I am confident speaking in front of people"    | <input type="checkbox"/>  | <input type="checkbox"/> | <input type="checkbox"/> | <input type="checkbox"/> | <input type="checkbox"/>     |
|                                                    | <i>Strongly<br/>Agree</i> | <i>Agree</i>             | <i>Neutral</i>           | <i>Disagree</i>          | <i>Strongly<br/>Disagree</i> |

7. Why do you want to take this course?

---



---



---



---



---



---



---



---



---



---

**8. Do you have any expectations for the course?**

---

---

---

---

---

---

**9. What is the best way for you to learn new things?**

---

---

---

---

---

---

**10. Additional thoughts?**

---

---

---

---

---

---
