# Supplementary material for: Building confidence in STEM students through breaking (unseen) barriers
Source: Copernicus journal article supplement (doi:10.5194/gc-5-355-2022), 2022-11-14
Supplement: Supplementary file 3 [file gc-5-355-2022-supplement.zip]

# Post-course Evaluation 2

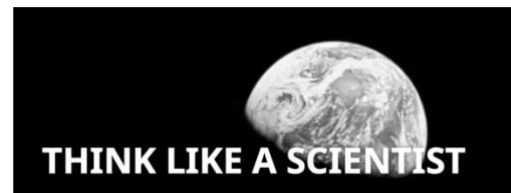

Course: *Think Like A Scientist*

Instructor: X

Rate the statement as it relates to you:

|                                                                                 | <i>Strongly<br/>Agree</i> | <i>Agree</i>             | <i>Neutral</i>           | <i>Disagree</i>          | <i>Strongly<br/>Disagree</i> |
|---------------------------------------------------------------------------------|---------------------------|--------------------------|--------------------------|--------------------------|------------------------------|
| 1. "This class increased my interest in science"                                | <input type="checkbox"/>  | <input type="checkbox"/> | <input type="checkbox"/> | <input type="checkbox"/> | <input type="checkbox"/>     |
| 2. "The instructor was knowledgeable of the subject being taught"               | <input type="checkbox"/>  | <input type="checkbox"/> | <input type="checkbox"/> | <input type="checkbox"/> | <input type="checkbox"/>     |
| 3. "The instructor was enthusiastic about the subject"                          | <input type="checkbox"/>  | <input type="checkbox"/> | <input type="checkbox"/> | <input type="checkbox"/> | <input type="checkbox"/>     |
| 4. "The class has encouraged me to think for myself"                            | <input type="checkbox"/>  | <input type="checkbox"/> | <input type="checkbox"/> | <input type="checkbox"/> | <input type="checkbox"/>     |
| 5. "The instructor was clear in presenting the material"                        | <input type="checkbox"/>  | <input type="checkbox"/> | <input type="checkbox"/> | <input type="checkbox"/> | <input type="checkbox"/>     |
| 6. "The instructor was interested in questions and/or discussions during class" | <input type="checkbox"/>  | <input type="checkbox"/> | <input type="checkbox"/> | <input type="checkbox"/> | <input type="checkbox"/>     |
| 7. "The course overall was interesting"                                         | <input type="checkbox"/>  | <input type="checkbox"/> | <input type="checkbox"/> | <input type="checkbox"/> | <input type="checkbox"/>     |
| 8. "I would take this course again"                                             | <input type="checkbox"/>  | <input type="checkbox"/> | <input type="checkbox"/> | <input type="checkbox"/> | <input type="checkbox"/>     |
| 9. "The after-class work was set at the right education level"                  | <input type="checkbox"/>  | <input type="checkbox"/> | <input type="checkbox"/> | <input type="checkbox"/> | <input type="checkbox"/>     |
| 10. "I learned a lot during the course"                                         | <input type="checkbox"/>  | <input type="checkbox"/> | <input type="checkbox"/> | <input type="checkbox"/> | <input type="checkbox"/>     |
| 11. "I found the course too difficult"                                          | <input type="checkbox"/>  | <input type="checkbox"/> | <input type="checkbox"/> | <input type="checkbox"/> | <input type="checkbox"/>     |
|                                                                                 | <i>Strongly<br/>Agree</i> | <i>Agree</i>             | <i>Neutral</i>           | <i>Disagree</i>          | <i>Strongly<br/>Disagree</i> |

**12. Which week did you like the best?**

Week 1 (Science of Sleep): ☐



Week 3 (Geoscience): ☐



Week 5 (The Universe): ☐



Week 2 (The Atmosphere): ☐

1

Week 4 (Space Missions): ☐

1

Week 6 (Robots/AI):



**13. Which week did you like the least?**

Week 1 (Science of Sleep): ☐



Week 3 (Geoscience): ☐



Week 5 (The Universe): ☐



Week 2 (The Atmosphere): ☐



Week 4 (Space Missions): ☐

1

Week 6 (Robots/AI):

1

**14. Any further feedback?**
