# Supplementary material for: Building confidence in STEM students through breaking (unseen) barriers
Source: Copernicus journal article supplement (doi:10.5194/gc-5-355-2022), 2022-11-14
Supplement: Supplementary file 4 [file gc-5-355-2022-supplement.zip]

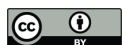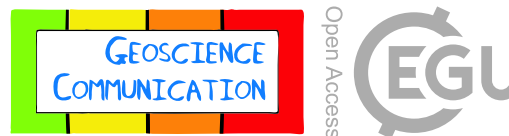

## *Supplement of*

# **Building confidence in STEM students through breaking (unseen) barriers**

**Philip J. Heron and Jamie A. Williams**

*Correspondence to:* Philip J. Heron ([philip.heron@utoronto.ca](mailto:philip.heron@utoronto.ca))

- [gc-5-355-2022-supplement-title-page.pdf](#)
- [egusphere-2022-16-supplement-version1](#)
  - [Feedback\\_questionnaire\\_egusphere16](#)
    - \* [TLAS\\_feedback\\_2019.pdf](#)
    - \* [TLAS\\_template\\_post1.pdf](#)
    - \* [TLAS\\_template\\_post2.pdf](#)
    - \* [TLAS\\_template\\_pre.pdf](#)

The copyright of individual parts of the supplement might differ from the article licence.
